# Supplementary material for: Crown ether complexes of actinyls: a computational assessment of AnO2(15-crown-5)2+(An = U, Np, Pu, Am, Cm)
Source: Royal Society of Chemistry journal article supplement (doi:10.1039/c7dt02825c), 2017-01-01
Supplement: c7dt02825c1.pdf [file c7dt02825c1.pdf]

## Supporting Information

### **Crown Ether Complexes of Actinyls: A Computational Assessment of $\text{AnO}_2(\text{15-crown-5})^{2+}$ (An=U, Np, Pu, Am, Cm)**

Shu-Xian Hu,<sup>1</sup> Wan-Lu Li,<sup>2</sup> Liang Dong,<sup>3</sup> John K. Gibson,<sup>4\*</sup> and Jun Li<sup>2\*</sup>

<sup>1</sup> Beijing Computational Science Research Center, Beijing 100193, China.

<sup>2</sup> Department of Chemistry and Key Laboratory of Organic Optoelectronics & Molecular Engineering of Ministry of Education, Tsinghua University, Beijing 100084, China.

<sup>3</sup> Institute of Nuclear Physics and Chemistry, China Academy of Engineering Physics, Sichuan 621900, China.

<sup>4</sup> Chemical Sciences Division, Lawrence Berkeley National Laboratory, Berkeley, California 94720, United States.

\*Corresponding author. E-mail: jkgibson@lbl.gov(Gibson); junli@tsinghua.edu.cn (Li).

**Table S1.** Relative energies (kcal/mol) and binding energy (BE, kcal/mol) of  $\text{AnO}_2(15\text{C5})^{2+}$  (An = U, Np, Pu) isomers computed at PBE levels of theory.

| Molecule                         | Isomer      | GS           | Relative E (kcal/mol) |       | BDE(kcal/mol) |         |
|----------------------------------|-------------|--------------|-----------------------|-------|---------------|---------|
|                                  |             |              | SR                    | SO    | SR            | SO      |
| $\text{UO}_2(15\text{C5})^{2+}$  | Insertion-1 | $^1\text{A}$ | 0                     | 0     | -233.88       | -235.69 |
|                                  | Insertion-2 | $^1\text{A}$ | 0.01                  | 0.02  | -233.87       | -235.67 |
|                                  | Insertion-3 | $^1\text{A}$ | 2.52                  | 2.62  | -231.36       | -233.07 |
|                                  | Side-on     | $^1\text{A}$ | 15.61                 | 15.79 | -218.27       | -219.9  |
| $\text{NpO}_2(15\text{C5})^{2+}$ | Insertion-1 | $^2\text{A}$ | 0                     | 0     | -232.93       | -229.8  |
|                                  | Insertion-2 | $^2\text{A}$ | 0.03                  | 0.15  | -232.9        | -229.65 |
|                                  | Insertion-3 | $^2\text{A}$ | 2.89                  | 2.53  | -230.04       | -227.27 |
|                                  | Side-on     | $^2\text{A}$ | 18.92                 | 22.75 | -214.01       | -207.05 |
| $\text{PuO}_2(15\text{C5})^{2+}$ | Insertion-1 | $^3\text{A}$ | 0                     | 0     | -240.23       | -232.87 |
|                                  | Insertion-2 | $^3\text{A}$ | 0.02                  | 0.84  | -240.21       | -232.00 |
|                                  | Insertion-3 | $^3\text{A}$ | 1.98                  | 2.56  | -238.25       | -230.28 |
|                                  | Side-on     | $^3\text{A}$ | 30.86                 | 32.87 | -209.37       | -200.00 |

**Table S2.** Selected bond lengths ( $\text{\AA}$ ) and bond angles (degree) of the ground state  $\text{AnO}_2(15\text{C5})^{2+}$  insertion isomers at B3LYP level.

| Species <sup>[a]</sup>        | Insertion                                      |                                              |                                                    |                                        | Side-on            |                                              |                                        |
|-------------------------------|------------------------------------------------|----------------------------------------------|----------------------------------------------------|----------------------------------------|--------------------|----------------------------------------------|----------------------------------------|
|                               | An-O <sub>yl</sub> <sup>[c]</sup><br>(complex) | An-O <sub>e</sub> <sup>[d]</sup>             | $\angle\text{O}_{yl}\text{-An-O}_e$ <sup>[d]</sup> | $\angle\text{O}_{yl}\text{-An-O}_{yl}$ | An-O <sub>yl</sub> | An-O <sub>e</sub> <sup>[d]</sup>             | $\angle\text{O}_{yl}\text{-An-O}_{yl}$ |
| $\text{UO}_2(\text{L})^{2+}$  | 1.782<br>1.785                                 | 2.382, 2.424, 2.422,<br>2.411, 2.418 (2.411) | 85.3, 90.8, 91.8,<br>94.6, 96.3 (91.8)             | 178.6                                  | 1.813<br>1.813     | 2.513, 2.529, 2.545,<br>2.499, 2.587 (2.535) | 102.2                                  |
| $\text{NpO}_2(\text{L})^{2+}$ | 1.763<br>1.765                                 | 2.362, 2.407, 2.410,<br>2.416, 2.426 (2.404) | 84.7, 90.7, 91.3,<br>95.2, 96.0 (91.6)             | 179.1                                  | 1.801<br>1.805     | 2.498, 2.509, 2.509,<br>2.511, 2.543 (2.514) | 100.7                                  |
| $\text{PuO}_2(\text{L})^{2+}$ | 1.756<br>1.759                                 | 2.376, 2.403, 2.403,<br>2.408, 2.417 (2.401) | 94.1, 95.0, 98.9,<br>88.8, 100.5 (95.5)            | 179.2                                  | 1.803<br>1.808     | 2.490, 2.496, 2.487,<br>2.505, 2.526 (2.501) | 97.2                                   |

|                                    |                |                                              |                                        |       |                |                                              |      |
|------------------------------------|----------------|----------------------------------------------|----------------------------------------|-------|----------------|----------------------------------------------|------|
| AmO <sub>2</sub> (L) <sup>2+</sup> | 1.750<br>1.751 | 2.380,2.381,2.387,<br>2.413, 2.424 (2.397)   | 84.7, 89.8, 90.8,<br>95.6, 95.4 (91.3) | 179.8 | 1.833<br>1.831 | 2.513, 2.478, 2.504,<br>2.453, 2.500 (2.490) | 96.5 |
| CmO <sub>2</sub> (L) <sup>2+</sup> | 1.759<br>1.760 | 2.344, 2.386, 2.388,<br>2.397, 2.399 (2.383) | 85.0, 88.7, 90.0,<br>94.9, 95.1 (90.7) | 179.5 | 1.882<br>1.861 | 2.430, 2.480, 2.552,<br>2.451, 2.475 (2.478) | 86.3 |

<sup>[a]</sup> L denotes the 15-crown-5 ether. <sup>[b]</sup> PBE calculated for isolated actinyl. <sup>[c]</sup> PBE calculated for actinyl complex.

<sup>[d]</sup> Average in parentheses. <sup>[e]</sup> EXAFS value for UO<sub>2</sub><sup>2+</sup>, NpO<sub>2</sub><sup>2+</sup>, XANES value for PuO<sub>2</sub><sup>2+</sup> ions with water. <sup>[f]</sup>

XRD values for UO<sub>2</sub><sup>2+</sup>, NpO<sub>2</sub><sup>2+</sup>, and PuO<sub>2</sub><sup>2+</sup> ions with carbonate.

**Table S3.** Selected bond lengths (Å) and bond angles (degree) of the ground state AnO<sub>2</sub>(15C5)<sup>2+</sup> insertion isomers at B3LYP.

| Species <sup>[a]</sup>             | Insertion                                      |                                              |                                      | Side-on            |                                              |                                      |
|------------------------------------|------------------------------------------------|----------------------------------------------|--------------------------------------|--------------------|----------------------------------------------|--------------------------------------|
|                                    | An-O <sub>yl</sub> <sup>[c]</sup><br>(complex) | An-O <sub>e</sub> <sup>[d]</sup>             | ∠O <sub>yl</sub> -An-O <sub>yl</sub> | An-O <sub>yl</sub> | An-O <sub>e</sub> <sup>[d]</sup>             | ∠O <sub>yl</sub> -An-O <sub>yl</sub> |
| UO <sub>2</sub> (L) <sup>2+</sup>  | 1.753<br>1.754                                 | 2.396, 2.403, 2.365, 2.410,<br>2.406 (2.396) | 179.1                                | 1.783<br>1.783     | 2.494, 2.542, 2.587, 2.498,<br>2.529 (2.530) | 103.5                                |
| NpO <sub>2</sub> (L) <sup>2+</sup> | 1.739<br>1.740                                 | 2.357, 2.397, 2.394, 2.396,<br>2.401 (2.389) | 179.4                                | 1.771<br>1.773     | 2.490, 2.500, 2.512, 2.516,<br>2.552 (2.514) | 106.1                                |
| PuO <sub>2</sub> (L) <sup>2+</sup> | 1.712<br>1.714                                 | 2.381, 2.388, 2.353, 2.384,<br>2.396 (2.380) | 179.6                                | 1.782<br>1.784     | 2.476, 2.504, 2.489, 2.513,<br>2.484 (2.493) | 97.2                                 |
| AmO <sub>2</sub> (L) <sup>2+</sup> | 1.714<br>1.715                                 | 2.391,2.347,2.383, 2.385,<br>2.374 (2.376)   | 179.7                                | 1.857<br>1.980     | 2.509, 2.422, 2.460, 2.473,<br>2.469 (2.467) | 82.6                                 |
| CmO <sub>2</sub> (L) <sup>2+</sup> | 1.732<br>1.732                                 | 2.341, 2.389, 2.382, 2.378,<br>2.392 (2.376) | 179.7                                | 2.307<br>2.310     | 2.417, 2.450, 2.437, 2.468,<br>2.472 (2.449) | 57.9                                 |

**Table S4.** Calculated vibrational frequencies (cm<sup>-1</sup>) and intensities (in parentheses, km/mol) of ground-state AnO<sub>2</sub>(15C5)<sup>2+</sup> (An = U, Np, Pu, Am, Cm) at PBE/TZ2P level.

| Molecule                              | An-O <sub>y1</sub> |        | An-O <sub>e</sub>                        | C-O                |
|---------------------------------------|--------------------|--------|------------------------------------------|--------------------|
|                                       | asym.              | sym.   |                                          |                    |
| UO <sub>2</sub> (15C5) <sup>2+</sup>  | 962(144)           | 874(0) | 385(35), 378(36), 372(5), 346(2), 336(1) | 982(397), 977(364) |
| NpO <sub>2</sub> (15C5) <sup>2+</sup> | 967(118)           | 868(0) | 384(29), 376(35), 367(6), 343(2), 333(1) | 985(391), 981(318) |
| PuO <sub>2</sub> (15C5) <sup>2+</sup> | 961(136)           | 844(0) | 378(24), 372(27), 362(1), 347(1), 339(2) | 993(346), 984(360) |
| AmO <sub>2</sub> (15C5) <sup>2+</sup> | 948(113)           | 820(0) | 380(21), 369(23), 353(2), 353(2), 344(5) | 991(344), 986(180) |
| CmO <sub>2</sub> (15C5) <sup>2+</sup> | 907(69)            | 752(5) | 382(14), 370(17), 359(2), 350(0), 344(1) | 994(396), 968(3)   |

**Table S5.** Observed and calculated (PBE level; unscaled) vibrational frequencies (in  $\text{cm}^{-1}$ ) of  $\text{UO}_2(15\text{C5})^{2+}$ .

| IR Mode <sup>[a]</sup>                            | Exptl. <sup>[b]</sup> | Inclusion            |                      |                       | Sleeping |                       |
|---------------------------------------------------|-----------------------|----------------------|----------------------|-----------------------|----------|-----------------------|
|                                                   |                       | Freq. <sup>[c]</sup> | Freq. <sup>[d]</sup> | Inten. <sup>[e]</sup> | Freq.    | Inten. <sup>[e]</sup> |
|                                                   |                       | 739                  | 724                  | 16                    | 762      | 10                    |
|                                                   |                       | 755                  | 740                  | 10                    | 782      | 21                    |
|                                                   |                       | 759                  | 744                  | 26                    | 785      | 16                    |
|                                                   |                       | 762                  | 747                  | 38                    | 797      | 45                    |
|                                                   |                       | 796                  | 780                  | 1                     | 830      | 64                    |
|                                                   |                       | 861                  | 844                  | 14                    | 848      | 105                   |
|                                                   |                       | 870                  | 853                  | 0                     | 885      | 58                    |
| $\text{O}_{\text{yl}}\text{UO}_{\text{yl}}$ sym.  |                       | 874                  | 857                  | 0                     | 887      | 29                    |
|                                                   |                       | 878                  | 860                  | 7                     | 907      | 6                     |
|                                                   |                       | 890                  | 872                  | 128                   | 911      | 43                    |
|                                                   |                       | 893                  | 875                  | 107                   | 924      | 118                   |
|                                                   |                       | 934                  | 915                  | 6                     | 932      | 114                   |
|                                                   |                       | 956                  | 937                  | 20                    | 953      | 1                     |
|                                                   |                       | 960                  | 941                  | 49                    | 969      | 5                     |
| $\text{O}_{\text{yl}}\text{UO}_{\text{yl}}$ asym. | 908(m)                | 962                  | 943                  | 144                   | 979      | 15                    |
|                                                   |                       | 965                  | 946                  | 63                    | 1012     | 44                    |
| C-O stretching                                    | 967(s)                | 977                  | 957                  | 364                   | 1017     | 90                    |
|                                                   |                       | 982                  | 962                  | 397                   | 1022     | 199                   |
|                                                   |                       | 999                  | 979                  | 24                    | 1026     | 204                   |
|                                                   |                       | 1005                 | 985                  | 10                    | 1032     | 62                    |
|                                                   |                       | 1019                 | 999                  | 7                     | 1036     | 14                    |
| C-O stretching                                    | 1002(vs)              | 1027                 | 1006                 | 20                    | 1048     | 15                    |
|                                                   |                       | 1046                 | 1025                 | 1                     | 1066     | 2                     |
|                                                   |                       | 1054                 | 1033                 | 2                     | 1077     | 1                     |
|                                                   |                       | 1066                 | 1045                 | 2                     | 1083     | 11                    |
|                                                   |                       | 1080                 | 1058                 | 11                    | 1102     | 2                     |
|                                                   |                       | 1088                 | 1066                 | 1                     | 1105     | 1                     |
|                                                   |                       | 1188                 | 1164                 | 0                     | 1201     | 2                     |
|                                                   |                       | 1193                 | 1169                 | 2                     | 1206     | 2                     |
|                                                   |                       | 1199                 | 1175                 | 3                     | 1209     | 2                     |
|                                                   |                       | 1203                 | 1179                 | 20                    | 1215     | 10                    |
|                                                   |                       | 1212                 | 1188                 | 12                    | 1221     | 24                    |
|                                                   |                       | 1225                 | 1201                 | 0                     | 1232     | 2                     |

|  |  |      |      |    |      |    |
|--|--|------|------|----|------|----|
|  |  | 1228 | 1203 | 6  | 1237 | 1  |
|  |  | 1245 | 1220 | 33 | 1257 | 17 |
|  |  | 1248 | 1223 | 28 | 1258 | 15 |
|  |  | 1257 | 1232 | 1  | 1269 | 9  |
|  |  | 1302 | 1276 | 1  | 1312 | 0  |
|  |  | 1313 | 1287 | 6  | 1324 | 3  |
|  |  | 1316 | 1290 | 5  | 1325 | 3  |
|  |  | 1328 | 1301 | 0  | 1344 | 0  |
|  |  | 1336 | 1309 | 1  | 1349 | 2  |
|  |  | 1356 | 1329 | 1  | 1364 | 3  |
|  |  | 1357 | 1330 | 0  | 1374 | 1  |
|  |  | 1373 | 1346 | 4  | 1390 | 4  |
|  |  | 1377 | 1349 | 5  | 1403 | 4  |
|  |  | 1386 | 1358 | 0  | 1413 | 1  |
|  |  | 1426 | 1397 | 6  | 1431 | 4  |
|  |  | 1428 | 1399 | 5  | 1433 | 4  |
|  |  | 1428 | 1399 | 4  | 1435 | 12 |
|  |  | 1429 | 1400 | 9  | 1436 | 4  |
|  |  | 1430 | 1401 | 4  | 1438 | 5  |
|  |  | 1436 | 1407 | 7  | 1443 | 7  |
|  |  | 1441 | 1412 | 39 | 1446 | 29 |
|  |  | 1442 | 1413 | 9  | 1450 | 31 |
|  |  | 1443 | 1414 | 41 | 1452 | 12 |
|  |  | 1444 | 1415 | 2  | 1454 | 15 |

<sup>[a]</sup>O<sub>e</sub> and O<sub>yl</sub> denote 15-crown-5 ether oxygen atoms and uranyl oxygen atoms, respectively. <sup>[b]</sup>Experimental frequency; w, m, s, and vs denote weak, medium, strong and very strong, respectively. <sup>[c]</sup>PBE values of UO<sub>2</sub>(15C5)<sup>2+</sup> without scaled. <sup>[d]</sup>PBE values scaled by a factor of 0.98.

**Table S6.** Observed and calculated (PBE level; unscaled) vibrational frequencies (in  $\text{cm}^{-1}$ ) of  $\text{NpO}_2(15\text{C5})^{2+}$ .

| IR Mode <sup>[a]</sup>                  | Inclusion            |        | Side-on |        |
|-----------------------------------------|----------------------|--------|---------|--------|
|                                         | Freq. <sup>[b]</sup> | Inten. | Freq.   | Inten. |
|                                         | 738                  | 16     | 756     | 16     |
|                                         | 757                  | 10     | 782     | 20     |
|                                         | 761                  | 35     | 786     | 19     |
|                                         | 764                  | 28     | 795     | 42     |
|                                         | 797                  | 1      | 822     | 88     |
|                                         | 863                  | 15     | 826     | 58     |
| O <sub>yl</sub> NpO <sub>yl</sub> sym.  | 868                  | 0      | 862     | 49     |
|                                         | 875                  | 0      | 882     | 3      |
|                                         | 879                  | 4      | 903     | 41     |
|                                         | 894                  | 118    | 917     | 31     |
|                                         | 896                  | 109    | 925     | 91     |
|                                         | 936                  | 11     | 934     | 128    |
|                                         | 959                  | 11     | 951     | 1      |
|                                         | 961                  | 15     | 965     | 22     |
| O <sub>yl</sub> NpO <sub>yl</sub> asym. | 967                  | 118    | 976     | 5      |
|                                         | 968                  | 86     | 1009    | 33     |
|                                         | 981                  | 318    | 1017    | 138    |
| C-O stretching                          | 985                  | 391    | 1024    | 203    |
|                                         | 1003                 | 38     | 1030    | 59     |
|                                         | 1008                 | 5      | 1032    | 89     |
|                                         | 1020                 | 6      | 1036    | 31     |
|                                         | 1029                 | 19     | 1045    | 10     |
|                                         | 1046                 | 1      | 1065    | 0      |
|                                         | 1054                 | 2      | 1074    | 28     |
|                                         | 1066                 | 1      | 1087    | 2      |
|                                         | 1079                 | 10     | 1096    | 12     |
|                                         | 1090                 | 1      | 1107    | 2      |
|                                         | 1188                 | 0      | 1201    | 0      |
|                                         | 1194                 | 1      | 1207    | 2      |
|                                         | 1200                 | 2      | 1215    | 0      |
|                                         | 1204                 | 20     | 1219    | 3      |
|                                         | 1212                 | 13     | 1224    | 34     |
|                                         | 1225                 | 0      | 1233    | 2      |

|  |      |    |      |    |
|--|------|----|------|----|
|  | 1229 | 4  | 1234 | 0  |
|  | 1245 | 31 | 1254 | 17 |
|  | 1248 | 28 | 1255 | 10 |
|  | 1258 | 1  | 1269 | 1  |
|  | 1303 | 1  | 1312 | 0  |
|  | 1313 | 3  | 1324 | 3  |
|  | 1316 | 2  | 1325 | 2  |
|  | 1329 | 0  | 1344 | 1  |
|  | 1335 | 1  | 1347 | 0  |
|  | 1355 | 0  | 1365 | 0  |
|  | 1357 | 1  | 1375 | 3  |
|  | 1373 | 7  | 1392 | 2  |
|  | 1377 | 8  | 1401 | 6  |
|  | 1388 | 1  | 1414 | 3  |
|  | 1425 | 6  | 1429 | 2  |
|  | 1427 | 4  | 1433 | 6  |
|  | 1427 | 8  | 1433 | 4  |
|  | 1428 | 5  | 1437 | 3  |
|  | 1429 | 4  | 1441 | 2  |
|  | 1434 | 7  | 1442 | 13 |
|  | 1441 | 42 | 1444 | 35 |
|  | 1442 | 9  | 1451 | 23 |
|  | 1442 | 39 | 1452 | 24 |
|  | 1443 | 1  | 1453 | 6  |

<sup>[a]</sup>O<sub>e</sub> and O<sub>y1</sub> denote 15-crown-5 ether oxygen atoms and uranyl oxygen atoms, respectively. <sup>[b]</sup>PBE values of NpO<sub>2</sub>(15C5)<sup>2+</sup> without scaled.



**Table S7.** Observed and calculated (PBE level; unscaled) vibrational frequencies (in  $\text{cm}^{-1}$ ) of  $\text{PuO}_2(15\text{C5})^{2+}$ .

| IR Mode <sup>[a]</sup>                  | Inclusion            |        | Side-on |        |
|-----------------------------------------|----------------------|--------|---------|--------|
|                                         | Freq. <sup>[b]</sup> | Inten. | Freq.   | Inten. |
|                                         | 737                  | 13     | 759     | 12     |
|                                         | 761                  | 9      | 779     | 28     |
|                                         | 765                  | 27     | 784     | 37     |
|                                         | 771                  | 34     | 787     | 38     |
|                                         | 802                  | 2      | 798     | 41     |
|                                         | 844                  | 0      | 806     | 88     |
|                                         | 868                  | 17     | 840     | 0      |
|                                         | 878                  | 0      | 883     | 2      |
|                                         | 883                  | 6      | 907     | 34     |
|                                         | 897                  | 112    | 919     | 17     |
|                                         | 902                  | 88     | 927     | 88     |
|                                         | 941                  | 7      | 936     | 120    |
| O <sub>yl</sub> PuO <sub>yl</sub> asym. | 961                  | 136    | 954     | 1      |
|                                         | 965                  | 10     | 966     | 17     |
|                                         | 965                  | 15     | 976     | 6      |
|                                         | 970                  | 20     | 1010    | 42     |
| C-O stretching                          | 984                  | 360    | 1017    | 114    |
|                                         | 993                  | 346    | 1025    | 187    |
|                                         | 1009                 | 29     | 1031    | 72     |
|                                         | 1016                 | 13     | 1033    | 87     |
|                                         | 1022                 | 5      | 1039    | 19     |
|                                         | 1032                 | 19     | 1045    | 10     |
|                                         | 1047                 | 1      | 1064    | 0      |
|                                         | 1058                 | 2      | 1074    | 24     |
|                                         | 1067                 | 2      | 1086    | 1      |
|                                         | 1083                 | 10     | 1096    | 15     |
|                                         | 1091                 | 2      | 1106    | 2      |
|                                         | 1189                 | 0      | 1200    | 0      |
|                                         | 1194                 | 2      | 1207    | 1      |
|                                         | 1200                 | 1      | 1215    | 1      |
|                                         | 1205                 | 22     | 1219    | 2      |
|                                         | 1213                 | 9      | 1224    | 31     |
|                                         | 1225                 | 0      | 1231    | 2      |

|  |      |    |      |    |
|--|------|----|------|----|
|  | 1231 | 7  | 1233 | 0  |
|  | 1248 | 32 | 1252 | 17 |
|  | 1249 | 20 | 1255 | 10 |
|  | 1259 | 1  | 1267 | 1  |
|  | 1304 | 0  | 1311 | 0  |
|  | 1313 | 2  | 1323 | 1  |
|  | 1318 | 3  | 1324 | 1  |
|  | 1330 | 0  | 1344 | 1  |
|  | 1338 | 1  | 1346 | 0  |
|  | 1355 | 1  | 1365 | 0  |
|  | 1358 | 1  | 1373 | 2  |
|  | 1374 | 8  | 1392 | 3  |
|  | 1379 | 10 | 1400 | 10 |
|  | 1390 | 1  | 1414 | 3  |
|  | 1425 | 4  | 1428 | 2  |
|  | 1426 | 6  | 1432 | 6  |
|  | 1426 | 6  | 1433 | 4  |
|  | 1432 | 9  | 1435 | 2  |
|  | 1432 | 7  | 1442 | 10 |
|  | 1433 | 1  | 1443 | 26 |
|  | 1441 | 16 | 1443 | 17 |
|  | 1442 | 42 | 1450 | 34 |
|  | 1445 | 15 | 1451 | 15 |
|  | 1446 | 17 | 1452 | 6  |

<sup>[a]</sup>O<sub>e</sub> and O<sub>y1</sub> denote 15-crown-5 ether oxygen atoms and uranyl oxygen atoms, respectively. <sup>[b]</sup>PBE values of PuO<sub>2</sub>(15C5)<sup>2+</sup> without scaled.

**Table S8.** Observed and calculated (PBE level; unscaled) vibrational frequencies (in  $\text{cm}^{-1}$ ) of  $\text{AmO}_2(15\text{C5})^{2+}$ .

| IR Mode <sup>[a]</sup>                             | Inclusion            |        | Side-on |        |
|----------------------------------------------------|----------------------|--------|---------|--------|
|                                                    | Freq. <sup>[b]</sup> | Inten. | Freq.   | Inten. |
|                                                    | 744                  | 10     | 680     | 23     |
|                                                    | 753                  | 9      | 715     | 48     |
|                                                    | 766                  | 36     | 749     | 17     |
|                                                    | 771                  | 21     | 779     | 22     |
|                                                    | 799                  | 3      | 784     | 17     |
|                                                    | 820                  | 0      | 796     | 36     |
|                                                    | 864                  | 15     | 831     | 6      |
|                                                    | 879                  | 18     | 884     | 1      |
|                                                    | 886                  | 0      | 898     | 46     |
|                                                    | 903                  | 71     | 915     | 12     |
|                                                    | 905                  | 75     | 924     | 76     |
|                                                    | 943                  | 6      | 932     | 101    |
| $\text{O}_{\text{yl}}\text{AmO}_{\text{yl}}$ asym. | 948                  | 113    | 949     | 2      |
|                                                    | 953                  | 47     | 962     | 28     |
|                                                    | 968                  | 32     | 970     | 6      |
|                                                    | 971                  | 13     | 1002    | 67     |
| C-O stretching                                     | 986                  | 180    | 1011    | 49     |
|                                                    | 991                  | 344    | 1019    | 144    |
|                                                    | 1009                 | 77     | 1027    | 80     |
|                                                    | 1019                 | 7      | 1032    | 68     |
|                                                    | 1022                 | 11     | 1037    | 20     |
|                                                    | 1030                 | 14     | 1042    | 40     |
|                                                    | 1045                 | 2      | 1066    | 1      |
|                                                    | 1059                 | 1      | 1073    | 21     |
|                                                    | 1071                 | 2      | 1082    | 3      |
|                                                    | 1082                 | 26     | 1093    | 10     |
|                                                    | 1092                 | 2      | 1105    | 4      |
|                                                    | 1188                 | 1      | 1198    | 0      |
|                                                    | 1195                 | 1      | 1203    | 1      |
|                                                    | 1200                 | 1      | 1211    | 1      |
|                                                    | 1205                 | 18     | 1217    | 2      |
|                                                    | 1211                 | 12     | 1221    | 30     |
|                                                    | 1225                 | 0      | 1232    | 2      |

|  |      |    |      |    |
|--|------|----|------|----|
|  | 1233 | 3  | 1234 | 0  |
|  | 1247 | 29 | 1252 | 16 |
|  | 1250 | 20 | 1255 | 10 |
|  | 1259 | 1  | 1268 | 1  |
|  | 1302 | 0  | 1310 | 0  |
|  | 1313 | 1  | 1321 | 1  |
|  | 1315 | 1  | 1323 | 1  |
|  | 1327 | 0  | 1343 | 1  |
|  | 1336 | 1  | 1344 | 2  |
|  | 1353 | 1  | 1361 | 3  |
|  | 1355 | 1  | 1371 | 5  |
|  | 1373 | 12 | 1386 | 3  |
|  | 1375 | 13 | 1399 | 6  |
|  | 1392 | 5  | 1412 | 4  |
|  | 1421 | 11 | 1423 | 2  |
|  | 1423 | 6  | 1429 | 2  |
|  | 1428 | 5  | 1434 | 8  |
|  | 1430 | 6  | 1435 | 9  |
|  | 1431 | 5  | 1437 | 2  |
|  | 1439 | 7  | 1438 | 39 |
|  | 1442 | 37 | 1439 | 11 |
|  | 1443 | 13 | 1445 | 38 |
|  | 1445 | 34 | 1452 | 9  |
|  | 1446 | 1  | 1453 | 13 |

<sup>[a]</sup>O<sub>e</sub> and O<sub>y1</sub> denote 15-crown-5 ether oxygen atoms and uranyl oxygen atoms, respectively. <sup>[b]</sup>PBE values of AmO<sub>2</sub>(15C5)<sup>2+</sup> without scaled.

**Table S9.** Observed and calculated (PBE level; unscaled) vibrational frequencies (in  $\text{cm}^{-1}$ ) of  $\text{CmO}_2(15\text{C5})^{2+}$ .

| IR Mode <sup>[a]</sup>                  | Inclusion            |        | Side-on |        |
|-----------------------------------------|----------------------|--------|---------|--------|
|                                         | Freq. <sup>[b]</sup> | Inten. | Freq.   | Inten. |
|                                         | 751                  | 3      | 610     | 21     |
|                                         | 752                  | 5      | 761     | 3      |
|                                         | 765                  | 7      | 774     | 30     |
|                                         | 772                  | 37     | 776     | 13     |
|                                         | 774                  | 38     | 798     | 41     |
|                                         | 814                  | 0      | 830     | 14     |
|                                         | 873                  | 4      | 888     | 1      |
|                                         | 878                  | 1      | 897     | 37     |
|                                         | 886                  | 6      | 907     | 19     |
|                                         | 899                  | 101    | 919     | 79     |
|                                         | 905                  | 67     | 927     | 72     |
| O <sub>yl</sub> CmO <sub>yl</sub> asym. | 907                  | 69     | 947     | 0      |
|                                         | 948                  | 5      | 962     | 19     |
|                                         | 968                  | 3      | 975     | 9      |
|                                         | 968                  | 7      | 1003    | 18     |
|                                         | 971                  | 31     | 1008    | 146    |
|                                         | 991                  | 354    | 1016    | 86     |
| C-O stretching                          | 994                  | 396    | 1026    | 135    |
|                                         | 1012                 | 6      | 1032    | 76     |
|                                         | 1017                 | 16     | 1037    | 34     |
|                                         | 1026                 | 6      | 1050    | 31     |
|                                         | 1030                 | 12     | 1063    | 2      |
|                                         | 1051                 | 1      | 1072    | 3      |
|                                         | 1058                 | 6      | 1079    | 7      |
|                                         | 1069                 | 3      | 1097    | 14     |
|                                         | 1082                 | 22     | 1102    | 4      |
|                                         | 1090                 | 2      | 1195    | 2      |
|                                         | 1191                 | 0      | 1200    | 4      |
|                                         | 1197                 | 0      | 1205    | 5      |
|                                         | 1202                 | 3      | 1211    | 10     |
|                                         | 1206                 | 19     | 1217    | 23     |
|                                         | 1212                 | 15     | 1232    | 0      |
|                                         | 1226                 | 0      | 1235    | 2      |

|  |      |    |      |    |
|--|------|----|------|----|
|  | 1229 | 5  | 1256 | 7  |
|  | 1246 | 25 | 1257 | 12 |
|  | 1248 | 18 | 1268 | 6  |
|  | 1257 | 0  | 1309 | 0  |
|  | 1304 | 0  | 1319 | 1  |
|  | 1315 | 3  | 1322 | 1  |
|  | 1317 | 4  | 1341 | 1  |
|  | 1329 | 0  | 1346 | 4  |
|  | 1336 | 1  | 1359 | 7  |
|  | 1357 | 1  | 1368 | 5  |
|  | 1358 | 0  | 1387 | 7  |
|  | 1375 | 6  | 1398 | 11 |
|  | 1379 | 6  | 1409 | 4  |
|  | 1389 | 0  | 1418 | 6  |
|  | 1431 | 3  | 1421 | 5  |
|  | 1431 | 13 | 1432 | 15 |
|  | 1432 | 2  | 1434 | 24 |
|  | 1432 | 7  | 1436 | 27 |
|  | 1432 | 8  | 1437 | 4  |
|  | 1439 | 6  | 1438 | 33 |
|  | 1444 | 48 | 1444 | 4  |
|  | 1445 | 6  | 1453 | 8  |
|  | 1446 | 25 | 1454 | 19 |
|  | 1447 | 1  |      |    |

<sup>[a]</sup>O<sub>e</sub> and O<sub>y1</sub> denote 15-crown-5 ether oxygen atoms and uranyl oxygen atoms, respectively. <sup>[b]</sup>PBE values of CmO<sub>2</sub>(15C5)<sup>2+</sup> without scaled.

**Table S10.** The calculated natural localized molecular orbitals (NLMOs) of 15-crown-5 ether and  $AnO_2(15C5)^{2+}$  ( $An = U, Np, Pu$ ) complexes.

| Molecule                                                                 |                 | Type                                                                                  | Occ.                                                                                   | NLMO                                                                                    |
|--------------------------------------------------------------------------|-----------------|---------------------------------------------------------------------------------------|----------------------------------------------------------------------------------------|-----------------------------------------------------------------------------------------|
| 15C5                                                                     |                 | LP <sub>Oe</sub>                                                                      | 5*2.00                                                                                 | 98.23%O(44% <i>s</i> /55% <i>p</i> )                                                    |
|                                                                          |                 | LP <sub>Oe</sub>                                                                      | 5*2.00                                                                                 | 95.8%O(100% <i>p</i> )                                                                  |
| UO <sub>2</sub> (15C5) <sup>2+</sup>                                     | Inclusion       | $\sigma_{Oe-U}$                                                                       | 5*2.00                                                                                 | 90.5%O(28% <i>s</i> /72% <i>p</i> ) + 7.8%U(14% <i>s</i> /47% <i>d</i> /39% <i>f</i> )  |
|                                                                          |                 |                                                                                       |                                                                                        | 90.5%O(29% <i>s</i> /71% <i>p</i> ) + 7.9%U(14% <i>s</i> /47% <i>d</i> /39% <i>f</i> )  |
|                                                                          |                 |                                                                                       |                                                                                        | 90.6%O(30% <i>s</i> /70% <i>p</i> ) + 7.8%U(14% <i>s</i> /48% <i>d</i> /38% <i>f</i> )  |
|                                                                          |                 |                                                                                       |                                                                                        | 90.7%O(30% <i>s</i> /70% <i>p</i> ) + 7.8%U(15% <i>s</i> /49% <i>d</i> /36% <i>f</i> )  |
|                                                                          |                 |                                                                                       |                                                                                        | 91.4%O(42% <i>s</i> /58% <i>p</i> ) + 7.6%U(15% <i>s</i> /49% <i>d</i> /36% <i>f</i> )  |
|                                                                          | $\pi_{Oe-U}$    | 5*2.00                                                                                | 96.0%O(21% <i>s</i> /79% <i>p</i> ) + 2.1%U(31% <i>d</i> /64% <i>f</i> )               |                                                                                         |
| 95.9%O(19% <i>s</i> /81% <i>p</i> ) + 2.1%U(30% <i>d</i> /65% <i>f</i> ) |                 |                                                                                       |                                                                                        |                                                                                         |
| 95.7%O(17% <i>s</i> /83% <i>p</i> ) + 2.2%U(31% <i>d</i> /64% <i>f</i> ) |                 |                                                                                       |                                                                                        |                                                                                         |
| 95.8%O(17% <i>s</i> /83% <i>p</i> ) + 2.2%U(31% <i>d</i> /65% <i>f</i> ) |                 |                                                                                       |                                                                                        |                                                                                         |
| 93.7%O(96% <i>p</i> /4% <i>d</i> ) + 3.6%U(33% <i>d</i> /63% <i>f</i> )  |                 |                                                                                       |                                                                                        |                                                                                         |
| Side-on                                                                  | $\sigma_{Oe-U}$ | 5*2.00                                                                                | 91.8%O(28% <i>s</i> /72% <i>p</i> ) + 6.8%U(14% <i>s</i> /52% <i>d</i> /34% <i>f</i> ) |                                                                                         |
|                                                                          |                 |                                                                                       | 89.7%O(20% <i>s</i> /80% <i>p</i> ) + 8.7%U(8% <i>s</i> /29% <i>d</i> /62% <i>f</i> )  |                                                                                         |
|                                                                          |                 |                                                                                       | 92.0%O(29% <i>s</i> /71% <i>p</i> ) + 6.7%U(13% <i>s</i> /53% <i>d</i> /34% <i>f</i> ) |                                                                                         |
|                                                                          |                 |                                                                                       | 90.1%O(20% <i>s</i> /80% <i>p</i> ) + 8.3%U(8% <i>s</i> /36% <i>d</i> /56% <i>f</i> )  |                                                                                         |
|                                                                          |                 |                                                                                       | 91.6%O(30% <i>s</i> /70% <i>p</i> ) + 7.1%U(10% <i>s</i> /42% <i>d</i> /47% <i>f</i> ) |                                                                                         |
| $\pi_{Oe-U}$                                                             | 5*2.00          | 95.1%O(16% <i>s</i> /84% <i>p</i> ) + 2.7%U(5% <i>s</i> /33% <i>d</i> /61% <i>f</i> ) |                                                                                        |                                                                                         |
|                                                                          |                 | 96.5%O(27% <i>s</i> /73% <i>p</i> ) + 1.7%U(9% <i>s</i> /42% <i>d</i> /47% <i>f</i> ) |                                                                                        |                                                                                         |
|                                                                          |                 | 94.5%O(15% <i>s</i> /85% <i>p</i> ) + 3.3%U(8% <i>s</i> /35% <i>d</i> /56% <i>f</i> ) |                                                                                        |                                                                                         |
|                                                                          |                 | 96.4%O(26% <i>s</i> /74% <i>p</i> ) + 1.7%U(9% <i>s</i> /37% <i>d</i> /52% <i>f</i> ) |                                                                                        |                                                                                         |
|                                                                          |                 | 95.0%O(13% <i>s</i> /87% <i>p</i> ) + 2.7%U(5% <i>s</i> /34% <i>d</i> /60% <i>f</i> ) |                                                                                        |                                                                                         |
| NpO <sub>2</sub> (15C5) <sup>2+</sup>                                    | Inclusion       | $\sigma_{Oe-Np}$                                                                      | 5*2.00                                                                                 | 90.3%O(26% <i>s</i> /74% <i>p</i> ) + 7.9%Np(14% <i>s</i> /43% <i>d</i> /43% <i>f</i> ) |
|                                                                          |                 |                                                                                       |                                                                                        | 90.9%O(35% <i>s</i> /65% <i>p</i> ) + 7.9%Np(15% <i>s</i> /46% <i>d</i> /40% <i>f</i> ) |
|                                                                          |                 |                                                                                       |                                                                                        | 90.5%O(28% <i>s</i> /72% <i>p</i> ) + 7.8%Np(15% <i>s</i> /45% <i>d</i> /40% <i>f</i> ) |
|                                                                          |                 |                                                                                       |                                                                                        | 90.3%O(27% <i>s</i> /73% <i>p</i> ) + 8.0%Np(14% <i>s</i> /42% <i>d</i> /44% <i>f</i> ) |
|                                                                          |                 |                                                                                       |                                                                                        | 90.2%O(25% <i>s</i> /75% <i>p</i> ) + 8.1%Np(13% <i>s</i> /42% <i>d</i> /45% <i>f</i> ) |

|                                       |           |                         |        |                                                                                                                                                                                                                                                                                                                                                                                                                                                     |
|---------------------------------------|-----------|-------------------------|--------|-----------------------------------------------------------------------------------------------------------------------------------------------------------------------------------------------------------------------------------------------------------------------------------------------------------------------------------------------------------------------------------------------------------------------------------------------------|
|                                       |           | $\pi_{\text{Oe-Np}}$    | 5*2.00 | <p>96.1%O(23%<i>s</i>/77%<i>p</i>) + 2.0%Np(4%<i>s</i>/33%<i>d</i>/61%<i>f</i>)</p> <p>94.5%O(8%<i>s</i>/92%<i>p</i>) + 3.4%Np(1%<i>s</i>/26%<i>d</i>/72%<i>f</i>)</p> <p>95.9%O(19%<i>s</i>/81%<i>p</i>) + 2.1%Np(4%<i>s</i>/32%<i>d</i>/62%<i>f</i>)</p> <p>96.0%O(19%<i>s</i>/81%<i>p</i>) + 2.0%Np(6%<i>s</i>/36%<i>d</i>/57%<i>f</i>)</p> <p>96.2%O(21%<i>s</i>/79%<i>p</i>) + 1.9%Np(5%<i>s</i>/35%<i>d</i>/58%<i>f</i>)</p>                  |
|                                       | Side-on   | $\sigma_{\text{Oe-Np}}$ | 5*2.00 | <p>90.1%O(19%<i>s</i>/81%<i>p</i>) + 8.1%Np(8%<i>s</i>/35%<i>d</i>/57%<i>f</i>)</p> <p>90.5%O(25%<i>s</i>75%<i>p</i>) + 8.0%Np(9%<i>s</i>/34%<i>d</i>/57%<i>f</i>)</p> <p>90.5 %O(28%<i>s</i>/72%<i>p</i>) +6.5%Np(14%<i>s</i>/50%<i>d</i>/35%<i>f</i>)</p> <p>89.3%O(19%<i>s</i>/81%<i>p</i>) + 9.0%Np(7%<i>s</i>/25%<i>d</i>/67%<i>f</i>)</p> <p>90.1%O(28%<i>s</i>72%<i>p</i>) + 6.5%Np(14%<i>s</i>/50%<i>d</i>/36%<i>f</i>)</p>                 |
|                                       |           | $\pi_{\text{Oe-Np}}$    | 5*2.00 | <p>96.6%O(27%<i>s</i>/73%<i>p</i>) + 1.5%Np(9%<i>s</i>/42%<i>d</i>/47%<i>f</i>)</p> <p>96.0%O(18%<i>s</i>/82%<i>p</i>) + 2.0%Np(6%<i>s</i>/40%<i>d</i>/52%<i>f</i>)</p> <p>94.9%O(17%<i>s</i>/83%<i>p</i>) + 2.9%Np(8%<i>s</i>/37%<i>d</i>/54%<i>f</i>)</p> <p>96.7%O(28%<i>s</i>/72%<i>p</i>) + 1.6%Np(11%<i>s</i>/45%<i>d</i>/41%<i>f</i>)</p> <p>95.0 %O(16%<i>s</i>/84%<i>p</i>) + 2.9%Np(8%<i>s</i>/37%<i>d</i>/54%<i>f</i>)</p>               |
| PuO <sub>2</sub> (15C5) <sup>2+</sup> | Inclusion | $\sigma_{\text{Oe-Pu}}$ | 5*2.00 | <p>89.4%O(19%<i>s</i>/81%<i>p</i>) + 8.9%Pu(11%<i>s</i>/34%<i>d</i>/55%<i>f</i>)</p> <p>89.8%O(26%<i>s</i>/74%<i>p</i>) + 8.5%Pu(15%<i>s</i>/43%<i>d</i>/42%<i>f</i>)</p> <p>89.6%O(17%<i>s</i>/83%<i>p</i>) + 8.3%Pu(12%<i>s</i>/38%<i>d</i>/50%<i>f</i>)</p> <p>89.6%O(24%<i>s</i>/76%<i>p</i>) + 8.4%Pu(14%<i>s</i>/42%<i>d</i>/44%<i>f</i>)</p> <p>89.2%O(15%<i>s</i>/85%<i>p</i>) + 8.8%Pu(11%<i>s</i>/35%<i>d</i>/53%<i>f</i>)</p>            |
|                                       |           | $\pi_{\text{Oe-Pu}}$    | 5*2.00 | <p>95.5%O(23%<i>s</i>/77%<i>p</i>) + 2.6%Pu(12%<i>s</i>/58%<i>d</i>/30%<i>f</i>)</p> <p>97.1%O(17%<i>s</i>/83%<i>p</i>) + 0.8%Pu(7%<i>s</i>/73%<i>d</i>/17%<i>f</i>)</p> <p>96.0%O(27%<i>s</i>/73%<i>p</i>) + 2.2%Pu(15%<i>s</i>/55%<i>d</i>/30%<i>f</i>)</p> <p>97.2%O(20%<i>s</i>/80%<i>p</i>) + 0.8%Pu(8%<i>s</i>/73%<i>d</i>/16%<i>f</i>)</p> <p>96.0%O(31%<i>s</i>/69%<i>p</i>) + 2.3%Pu(13%<i>s</i>/53%<i>d</i>/33%<i>f</i>)</p>              |
|                                       | Side-on   | $\sigma_{\text{Oe-Pu}}$ | 5*2.00 | <p>91.1%O(25%<i>s</i>/75%<i>p</i>) + 7.5%Pu(10%<i>s</i>/35%<i>d</i>/55%<i>f</i>)</p> <p>90.5%O(18%<i>s</i>82%<i>p</i>) +7.7%Pu(8%<i>s</i>/33%<i>d</i>/59%<i>f</i><sup>8.06</sup>)</p> <p>92.6 %O(31%<i>s</i>/69%<i>p</i>) + 6.1%Pu(16%<i>s</i>/51%<i>d</i>/33%<i>f</i>)</p> <p>89.8%O(17%<i>s</i>/83%<i>p</i>) + 8.4%Pu(8%<i>s</i>/24%<i>d</i>/68%<i>f</i>)</p> <p>92.5%O(30%<i>s</i>70%<i>p</i>) + 6.0%Pu(16%<i>s</i>/50%<i>d</i>/33%<i>f</i>)</p> |



|                                       |           |                         |        |                                                                                                                                                                                                                                                                                                                                                                                                                                          |
|---------------------------------------|-----------|-------------------------|--------|------------------------------------------------------------------------------------------------------------------------------------------------------------------------------------------------------------------------------------------------------------------------------------------------------------------------------------------------------------------------------------------------------------------------------------------|
|                                       |           | $\pi_{\text{Oe-Pu}}$    | 5*2.00 | <p>96.0%O(16%<i>s</i>/84%<i>p</i>) + 1.9%Pu(6%<i>s</i>/45%<i>d</i>/48%<i>f</i>)</p> <p>96.8%O(28%<i>s</i>/72%<i>p</i>) + 1.4%Pu(10%<i>s</i>/47%<i>d</i>/41%<i>f</i>)</p> <p>95.0%O(13%<i>s</i>/87%<i>p</i>) + 2.8%Pu(7%<i>s</i>/38%<i>d</i>/54%<i>f</i>)</p> <p>96.8%O(29%<i>s</i>/71%<i>p</i>) + 1.4%Pu(13%<i>s</i>/51%<i>d</i>/34%<i>f</i>)</p> <p>95.1%O(14%<i>s</i>/86%<i>p</i>) + 2.7%Pu(8%<i>s</i>/38%<i>d</i>/53%<i>f</i>)</p>    |
| AmO <sub>2</sub> (15C5) <sup>2+</sup> | Inclusion | $\sigma_{\text{Oe-Pu}}$ | 5*2.00 | <p>91.3%O(26%<i>s</i>/74%<i>p</i>) + 7.1%Am(17%<i>s</i>/47%<i>d</i>/36%<i>f</i>)</p> <p>91.2%O(26%<i>s</i>/74%<i>p</i>) + 7.2%Am(16%<i>s</i>/43%<i>d</i>/41%<i>f</i>)</p> <p>90.8%O(21%<i>s</i>/79%<i>p</i>) + 7.4%Am(15%<i>s</i>/40%<i>d</i>/45%<i>f</i>)</p> <p>90.8%O(21%<i>s</i>/79%<i>p</i>) + 7.4%Am(15%<i>s</i>/40%<i>d</i>/44%<i>f</i>)</p> <p>91.4%O(31%<i>s</i>/69%<i>p</i>) + 7.3%Am(16%<i>s</i>/43%<i>d</i>/40%<i>f</i>)</p> |
|                                       |           | $\pi_{\text{Oe-Pu}}$    | 5*2.00 | <p>96.2%O(18%<i>s</i>/82%<i>p</i>) + 1.8%Am(6%<i>s</i>/43%<i>d</i>/49%<i>f</i>)</p> <p>96.2%O(18%<i>s</i>/82%<i>p</i>) + 1.8%Am(6%<i>s</i>/44%<i>d</i>/48%<i>f</i>)</p> <p>96.6%O(24%<i>s</i>/76%<i>p</i>) + 1.6%Am(6%<i>s</i>/45%<i>d</i>/47%<i>f</i>)</p> <p>96.6%O(26%<i>s</i>/74%<i>p</i>) + 1.6%Am(6%<i>s</i>/45%<i>d</i>/47%<i>f</i>)</p> <p>95.4%O(11%<i>s</i>/89%<i>p</i>) + 2.5%Am(3%<i>s</i>/36%<i>d</i>/60%<i>f</i>)</p>      |
|                                       | Side-on   | $\sigma_{\text{Oe-Pu}}$ | 5*2.00 | <p>91.9%O(21%<i>s</i>/79%<i>p</i>) + 6.6%Am(10%<i>s</i>/34%<i>d</i>/56%<i>f</i>)</p> <p>91.8%O(17%<i>s</i>/83%<i>p</i>) + 6.4%Am(10%<i>s</i>/35%<i>d</i>/55%<i>f</i>)</p> <p>93.0 %O(30%<i>s</i>/70%<i>p</i>) + 5.3%Am(18%<i>s</i>/52%<i>d</i>/30%<i>f</i>)</p> <p>90.7%O(16%<i>s</i>/84%<i>p</i>) + 7.6%Am(8%<i>s</i>/24%<i>d</i>/68%<i>f</i>)</p> <p>92.8%O(28%<i>s</i>/72%<i>p</i>) + 5.7%Am(18%<i>s</i>/50%<i>d</i>/32%<i>f</i>)</p> |
|                                       |           | $\pi_{\text{Oe-Pu}}$    | 5*2.00 | <p>96.5%O(21%<i>s</i>/79%<i>p</i>) + 1.6%Am(8%<i>s</i>/53%<i>d</i>/36%<i>f</i>)</p> <p>96.9%O(28%<i>s</i>/72%<i>p</i>) + 1.3%Am(12%<i>s</i>/53%<i>d</i>/32%<i>f</i>)</p> <p>95.7%O(14%<i>s</i>/86%<i>p</i>) + 2.1%Am(9%<i>s</i>/46%<i>d</i>/44%<i>f</i>)</p> <p>96.8%O(30%<i>s</i>/70%<i>p</i>) + 1.6%Am(14%<i>s</i>/55%<i>d</i>/29%<i>f</i>)</p> <p>95.7%O(16%<i>s</i>/84%<i>p</i>) + 2.1%Am(10%<i>s</i>/46%<i>d</i>/43%<i>f</i>)</p>   |
| CmO <sub>2</sub> (15C5) <sup>2+</sup> | Inclusion | $\sigma_{\text{Oe-Pu}}$ | 5*2.00 | <p>91.1%O(23%<i>s</i>/77%<i>p</i>) + 7.2%Cm(17%<i>s</i>/42%<i>d</i>/41%<i>f</i>)</p> <p>91.2%O(23%<i>s</i>/77%<i>p</i>) + 7.1%Cm(16%<i>s</i>/41%<i>d</i>/43%<i>f</i>)</p> <p>91.1%O(22%<i>s</i>/78%<i>p</i>) + 7.1%Cm(16%<i>s</i>/41%<i>d</i>/43%<i>f</i>)</p> <p>91.1%O(22%<i>s</i>/78%<i>p</i>) + 7.1%Cm(17%<i>s</i>/41%<i>d</i>/42%<i>f</i>)</p> <p>91.2%O(33%<i>s</i>/67%<i>p</i>) + 7.2%Cm(17%<i>s</i>/44%<i>d</i>/39%<i>f</i>)</p> |

|  |         |                                 |        |                                                                                                                                                                                                                                                                                                                                                                                                                                                                                                             |
|--|---------|---------------------------------|--------|-------------------------------------------------------------------------------------------------------------------------------------------------------------------------------------------------------------------------------------------------------------------------------------------------------------------------------------------------------------------------------------------------------------------------------------------------------------------------------------------------------------|
|  |         | $\pi_{\text{O}_e\text{-Pu}}$    | 5*2.00 | 96.2%O(22% <i>s</i> /78% <i>p</i> ) + 1.9% <i>Cm</i> (6% <i>s</i> /43% <i>d</i> /50% <i>f</i> )<br>96.1%O(21% <i>s</i> /79% <i>p</i> ) +2.0% <i>Cm</i> (7% <i>s</i> /43% <i>d</i> /49% <i>f</i> )<br>96.2%O(22% <i>s</i> /78% <i>p</i> ) +1.9% <i>Cm</i> (6% <i>s</i> /43% <i>d</i> /48% <i>f</i> )<br>96.2%O(24% <i>s</i> /76% <i>p</i> ) +1.9% <i>Cm</i> (7% <i>s</i> /43% <i>d</i> /49% <i>f</i> )<br>94.3%O(6% <i>s</i> /94% <i>p</i> ) +3.4% <i>Cm</i> (2% <i>s</i> /30% <i>d</i> /68% <i>f</i> )      |
|  | Side-on | $\sigma_{\text{O}_e\text{-Pu}}$ | 5*2.00 | 92.0%O(28% <i>s</i> /72% <i>p</i> ) +5.4% <i>Cm</i> (18% <i>s</i> /49% <i>d</i> /33% <i>f</i> )<br>93.2%O(26% <i>s</i> /74% <i>p</i> ) +5.1% <i>Cm</i> (18% <i>s</i> /50% <i>d</i> /31% <i>f</i> )<br>91.7%O(17% <i>s</i> /82% <i>p</i> ) +6.7% <i>Cm</i> (10% <i>s</i> /27% <i>d</i> /63% <i>f</i> )<br>92.0%O(17% <i>s</i> /83% <i>p</i> ) +6.4% <i>Cm</i> (10% <i>s</i> /30% <i>d</i> /59% <i>f</i> )<br>93.0%O(25% <i>s</i> /75% <i>p</i> ) +5.2% <i>Cm</i> (15% <i>s</i> /47% <i>d</i> /37% <i>f</i> ) |
|  |         | $\pi_{\text{O}_e\text{-Pu}}$    | 5*2.00 | 96.0%O(15% <i>s</i> /85% <i>p</i> ) + 1.7% <i>Cm</i> (5% <i>s</i> /46% <i>d</i> /48% <i>f</i> )<br>96.7%O(28% <i>s</i> /72% <i>p</i> ) +1.7% <i>Cm</i> (12% <i>s</i> /57% <i>d</i> /29% <i>f</i> )<br>95.5%O(18% <i>s</i> /82% <i>p</i> ) +2.5% <i>Cm</i> (12% <i>s</i> /48% <i>d</i> /39% <i>f</i> )<br>96.8%O(28% <i>s</i> /72% <i>p</i> ) +1.5% <i>Cm</i> (12% <i>s</i> /56% <i>d</i> /30% <i>f</i> )<br>95.9%O(19% <i>s</i> /81% <i>p</i> ) +2.0% <i>Cm</i> (10% <i>s</i> /51% <i>d</i> /38% <i>f</i> ) |

O<sub>e</sub> denotes crown ether O atom; LP denotes lone pair.

**Table S11.** Energy Decomposition Analyses (EDA, in kcal/mol) for C1 AnO<sub>2</sub>(15C5)<sup>2+</sup> at PBE/TZ2P level. Energy values are in kcal/mol.

| Interacting                         | UO <sub>2</sub> (L) <sup>2+</sup> ( <sup>1</sup> A)            | NpO <sub>2</sub> (L) <sup>2+</sup> ( <sup>2</sup> A)             |         | PuO <sub>2</sub> (L) <sup>2+</sup> ( <sup>4</sup> A <sub>2</sub> )               |         | AmO <sub>2</sub> (L) <sup>2+</sup> ( <sup>4</sup> A)                                           |         | CmO <sub>2</sub> (L) <sup>2+</sup> ( <sup>3</sup> A)                             |         |
|-------------------------------------|----------------------------------------------------------------|------------------------------------------------------------------|---------|----------------------------------------------------------------------------------|---------|------------------------------------------------------------------------------------------------|---------|----------------------------------------------------------------------------------|---------|
| Fragments                           | UO <sub>2</sub> <sup>2+</sup> ( <sup>1</sup> Σ) f <sup>0</sup> | NpO <sub>2</sub> <sup>2+</sup> ( <sup>2</sup> Φ) fφ <sup>1</sup> |         | PuO <sub>2</sub> <sup>2+</sup> ( <sup>3</sup> H) fσ <sup>1</sup> fφ <sup>1</sup> |         | AmO <sub>2</sub> <sup>2+</sup> ( <sup>4</sup> Δ <sub>u</sub> ) fφ <sup>2</sup> fδ <sup>1</sup> |         | CmO <sub>2</sub> <sup>2+</sup> ( <sup>5</sup> Σ) fδ <sup>2</sup> fφ <sup>2</sup> |         |
|                                     | 15C5 ( <sup>1</sup> A) ...45a <sup>2</sup>                     | 15C5 ( <sup>1</sup> A) ...45a <sup>2</sup>                       |         | 15C5 ( <sup>1</sup> A) ...45a <sup>2</sup>                                       |         | 15C5 ( <sup>1</sup> A) ...45a <sup>2</sup>                                                     |         | 15C5 ( <sup>1</sup> A) ...45a <sup>2</sup>                                       |         |
| ΔE <sub>int</sub>                   | -262.94                                                        | -261.24                                                          |         | -255.82                                                                          |         | -255.35                                                                                        |         | -249.17                                                                          |         |
| ΔE <sub>Pauli</sub>                 | 234.89                                                         | 233.96                                                           |         | 221.07                                                                           |         | 210.81                                                                                         |         | 208.93                                                                           |         |
| ΔE <sub>elstat</sub> <sup>[a]</sup> | -250.31(50.3%)                                                 | -247.10 (49.9%)                                                  |         | -242.30 (50.6%)                                                                  |         | -236.05 (50.6%)                                                                                |         | -237.31 (51.8%)                                                                  |         |
| ΔE <sub>orb</sub> <sup>[a]</sup>    | -247.52(49.7%)                                                 | -248.09 (50.1%)                                                  |         | -234.59 (49.4%)                                                                  |         | - 230.1 (49.4%)                                                                                |         | -220.78 (48.2%)                                                                  |         |
|                                     |                                                                | α                                                                | β       | α                                                                                | β       | α                                                                                              | β       | α                                                                                | β       |
| ΔE <sub>1</sub> <sup>[b]</sup>      | -43.51                                                         | -10.33                                                           | -19.48  | -9.78                                                                            | -18.91  | -7.08                                                                                          | -8.83   | -7.08                                                                            | -8.83   |
| ΔE <sub>2</sub> <sup>[b]</sup>      | -43.77                                                         | -17.25                                                           | -19.56  | -10.02                                                                           | -18.80  | -13.59                                                                                         | -8.88   | -13.59                                                                           | -8.88   |
| ΔE <sub>3</sub> <sup>[b]</sup>      | -23.18                                                         | -11.81                                                           | -5.72   | -15.66                                                                           | -5.33   | -16.04                                                                                         | -16.75  | -16.04                                                                           | -16.75  |
| ΔE <sub>4</sub> <sup>[b]</sup>      | -10.9                                                          | -8.86                                                            | -5.27   | -14.98                                                                           | -5.19   | -9.43                                                                                          | -16.66  | -9.43                                                                            | -16.66  |
| ΔE <sub>5</sub> <sup>[b][c]</sup>   | -9.16                                                          | -11.3                                                            | -5.24   | -11.94                                                                           | -9.28   | -12.34                                                                                         | -5.45   | -12.34                                                                           | -5.45   |
| ΔE <sub>6</sub> <sup>[b][c]</sup>   | -8.9                                                           | -5                                                               | -11.23  | -5.38                                                                            | -7.11   | -3.67                                                                                          | -11.09  | -3.67                                                                            | -11.09  |
| ΔE <sub>7</sub> <sup>[b][c]</sup>   | -8.98                                                          | -5.44                                                            | -4.57   | -5.42                                                                            | -4.17   | -3.08                                                                                          | -4.02   | -3.08                                                                            | -4.02   |
| ΔE <sub>8</sub> <sup>[b][c]</sup>   | -7.88                                                          | -5                                                               | -3.66   | -3.43                                                                            | -3.66   |                                                                                                | -2.61   |                                                                                  | -2.61   |
| ΔE <sub>9</sub> <sup>[b][c]</sup>   | -7.91                                                          | -3.41                                                            | -3.5    |                                                                                  | -3.39   |                                                                                                | -3.29   |                                                                                  | -3.29   |
| ΔE <sub>10</sub> <sup>[b][c]</sup>  | -6.98                                                          | -3.12                                                            | -3.36   |                                                                                  | -2.79   |                                                                                                | -3.12   |                                                                                  | -3.12   |
| ΔE <sub>11</sub> <sup>[b][c]</sup>  | -6.76                                                          |                                                                  | -3      |                                                                                  | -2.43   |                                                                                                | -3.24   |                                                                                  | -3.24   |
| ΔE <sub>12</sub> <sup>[b][c]</sup>  | -4.52                                                          |                                                                  |         |                                                                                  | -3.18   |                                                                                                | -3.05   |                                                                                  | -3.05   |
| ΔE <sub>13</sub> <sup>[b][c]</sup>  | -4.33                                                          |                                                                  |         |                                                                                  |         |                                                                                                |         |                                                                                  |         |
| Sum                                 | -238.76                                                        | -117.28                                                          | -118.77 | -117.92                                                                          | -117.03 | -102.02                                                                                        | -119.25 | -102.02                                                                          | -119.25 |

[a] The values in parentheses provide the percentage contribution to the total attractive interactions ΔE<sub>elstat</sub> + ΔE<sub>orb</sub>. [b] The values in parentheses provide the percentage contribution to the total orbital interactions ΔE<sub>orb</sub>. [c] The ΔE is the energy change associated with the change in the electronic state of the considered fragments during interacting with each other.

**Table S12.** Selected bond lengths (Å) and bond angles (degree) of the insertion and side-on isomers for  $\text{AnO}_2(15\text{C}5)^+$  at PBE level.

| Species*                          | Insertion          |                      |                                     |                                      | Side-on            |                      |                                      |
|-----------------------------------|--------------------|----------------------|-------------------------------------|--------------------------------------|--------------------|----------------------|--------------------------------------|
|                                   | An-O <sub>yl</sub> | An-O <sub>e</sub>    | ∠O <sub>yl</sub> -An-O <sub>e</sub> | ∠O <sub>yl</sub> -An-O <sub>yl</sub> | An-O <sub>yl</sub> | An-O <sub>e</sub>    | ∠O <sub>yl</sub> -An-O <sub>yl</sub> |
| UO <sub>2</sub> (L) <sup>+</sup>  | 1.843              | 2.500, 2.502, 2.482, | 83.3, 79.2, 93.9,                   | 177.7                                | 1.847              | 2.623, 2.673, 2.762, | 119.9                                |
|                                   | 1.834              | 2.493, 2.499 (2.495) | 78.8, 85.8 (84.2)                   |                                      | 1.844              | 2.803, 2.710 (2.714) |                                      |
| NpO <sub>2</sub> (L) <sup>+</sup> | 1.815              | 2.496, 2.487, 2.495, | 85.8, 83.5, 78.8,                   | 179.1                                | 1.796              | 2.646, 2.529, 2.535, | 167.9                                |
|                                   | 1.809              | 2.492, 2.474 (2.489) | 92.2, 77.1 (83.5)                   |                                      | 1.790              | 3.706, 4.376 (3.158) |                                      |
| PuO <sub>2</sub> (L) <sup>+</sup> | 1.801              | 2.482, 2.472, 2.479, | 82.2, 96.1, 80.8,                   | 179.4                                | 1.771              | 2.466, 2.539, 3.828, | 175.7                                |
|                                   | 1.793              | 2.477, 2.455 (2.473) | 88.8, 87.3(87.0)                    |                                      | 1.759              | 3.826, 4.495 (3.431) |                                      |
| AmO <sub>2</sub> (L) <sup>+</sup> | 1.802              | 2.480, 2.468, 2.473, | 87.3, 81.7, 95.8,                   | 179.8                                | 1.774              | 2.608, 2.619, 2.626, | 172.8                                |
|                                   | 1.796              | 2.476, 2.442 (2.468) | 80.4, 89.5(86.9)                    |                                      | 1.776              | 3.992, 4.685 (3.306) |                                      |
| CmO <sub>2</sub> (L) <sup>+</sup> | 1.824              | 2.470, 2.456, 2.457, | 87.0, 82.3, 96.3,                   | 179.3                                | 1.797              | 2.623, 2.528, 3.540, | 165.0                                |
|                                   | 1.816              | 2.468, 2.426 (2.455) | 81.2, 89.3 (87.2)                   |                                      | 1.805              | 2.539, 4.097 (3.065) |                                      |

\* L denotes 15-crown-5 ether.

**Table S13.** Selected bond lengths (Å) and bond angles (degree) of the insertion and side-on isomers for  $\text{AnO}_2(15\text{C}5)^+$  at B3LYP level.

| Species*                          | Insertion          |                                              |                                      | Side-on            |                              |                                      |
|-----------------------------------|--------------------|----------------------------------------------|--------------------------------------|--------------------|------------------------------|--------------------------------------|
|                                   | An-O <sub>yl</sub> | An-O <sub>e</sub>                            | ∠O <sub>yl</sub> -An-O <sub>yl</sub> | An-O <sub>yl</sub> | An-O <sub>e</sub>            | ∠O <sub>yl</sub> -An-O <sub>yl</sub> |
| UO <sub>2</sub> (L) <sup>+</sup>  | 1.804              | 2.479, 2.499, 2.478,<br>2.460, 2.484 (2.480) | 178.6                                | 1.823              | 2.622, 2.656, 2.734; (2.671) | 123.3                                |
|                                   | 1.815              |                                              |                                      | 1.827              | 2.794, 2.814                 |                                      |
| NpO <sub>2</sub> (L) <sup>+</sup> | 1.787              | 2.464, 2.483, 2.445,<br>2.476, 2.476 (2.469) | 179.0                                | 1.767              | 2.534, 2.542, 2.646; (2.574) | 167.4                                |
|                                   | 1.796              |                                              |                                      | 1.776              | 3.709, 4.305                 |                                      |
| PuO <sub>2</sub> (L) <sup>+</sup> | 1.767              | 2.467, 2.463, 2.440,<br>2.475, 2.462 (2.461) | 179.4                                | 1.743              | 2.539, 2.553, 2.656; (2.583) | 171.4                                |
|                                   | 1.776              |                                              |                                      | 1.753              | 3.710, 4.253                 |                                      |
| AmO <sub>2</sub> (L) <sup>+</sup> | 1.771              | 2.462, 2.465, 2.430,<br>2.468, 2.458 (2.456) | 179.4                                | 1.744              | 2.559, 2.565, 2.662; (2.595) | 172.1                                |
|                                   | 1.777              |                                              |                                      | 1.752              | 3.688, 4.165                 |                                      |
| CmO <sub>2</sub> (L) <sup>+</sup> | 1.805              | 2.467, 2.418, 2.442,<br>2.452, 2.455 (2.447) | 179.4                                | 1.787              | 2.530, 2.534, 2.620; (2.561) | 164.9                                |
|                                   | 1.815              |                                              |                                      | 1.792              | 3.590, 4.098                 |                                      |

\* L denotes 15-crown-5 ether.

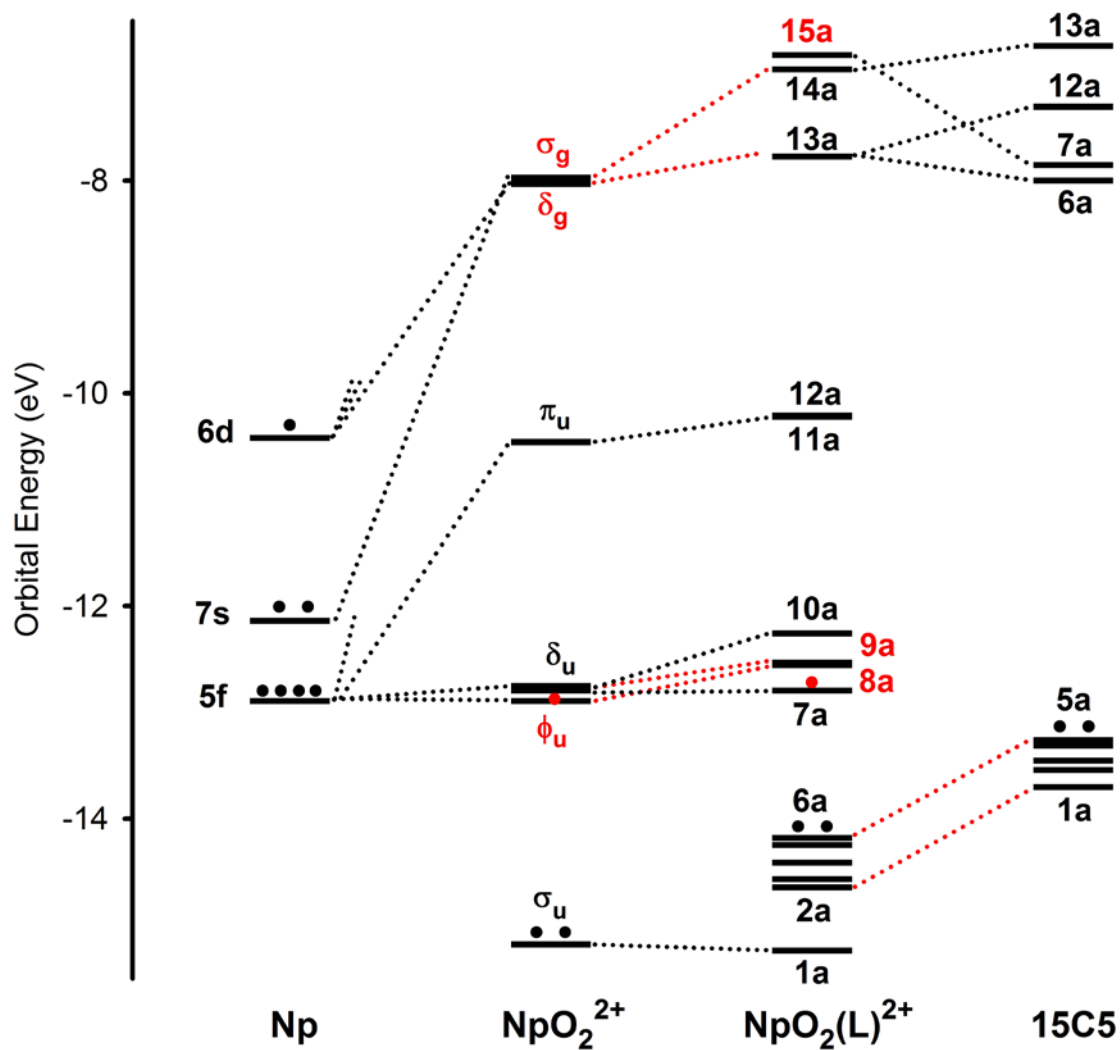

**Figure S1.** MO energy levels of Np<sup>VI</sup>O<sub>2</sub>(15C5)<sup>2+</sup> at SR-PBE/TZ2P level. 6a orbital is the HOMO, and 7a orbital is the LUMO.

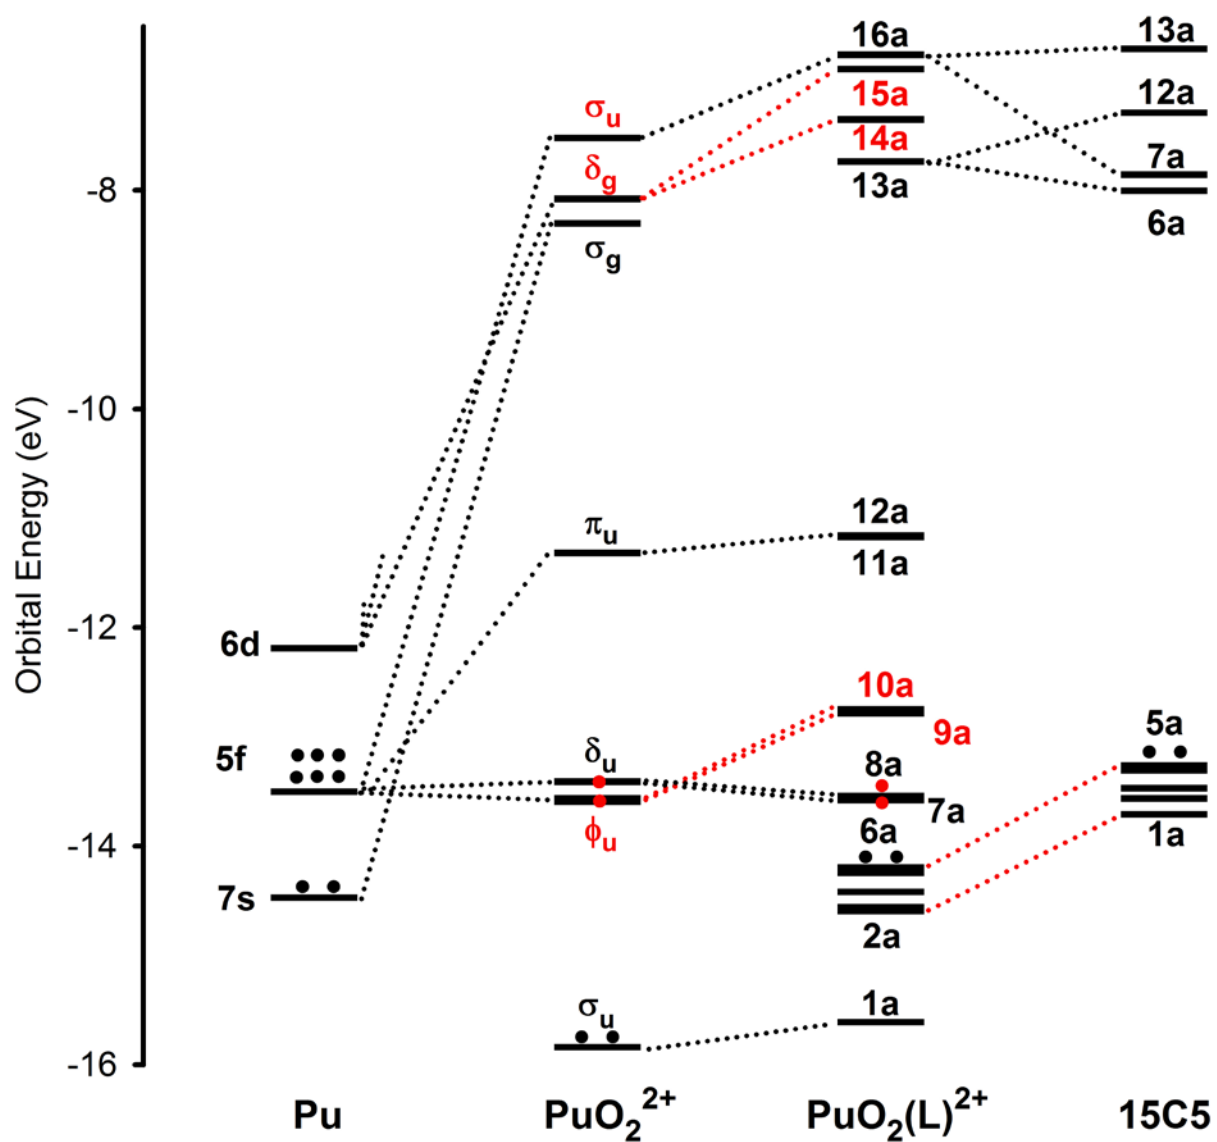

**Figure S2.** MO energy levels of Pu<sup>VI</sup>O<sub>2</sub>(15C5)<sup>2+</sup> at SR-PBE/TZ2P level. 6a orbital is the HOMO, and 7a orbital is the LUMO.

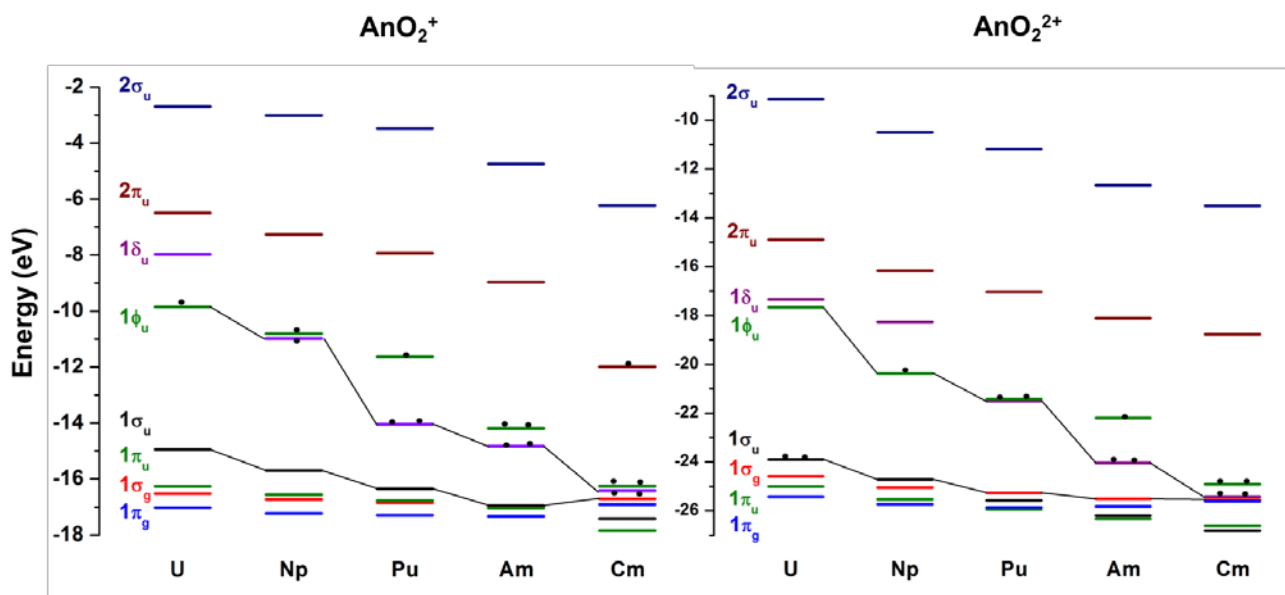

**Figure S3.** Scalar relativistic KS-PBE molecular orbital energy levels of free  $\text{AnO}_2^+$  and  $\text{AnO}_2^{2+}$  ions for  $\text{An} = \text{U}$ ,  $\text{Np}$ ,  $\text{Pu}$ ,  $\text{Am}$ , and  $\text{Cm}$ .
